# Supplementary material for: Enzyme immobilisation on poly-l-lysine-containing calcium phosphate particles for highly sensitive glucose detection
Source: Royal Society of Chemistry journal article supplement (doi:10.1039/c9ra01764j), 2019-01-01
Supplement: c9ra01764j1.pdf [file c9ra01764j1.pdf]

## Supplementary material

### Enzyme immobilisation on poly-L-lysine-containing calcium phosphate particles for highly sensitive glucose detection

Suzuka Kojima, Fukue Nagata, Masahiko Inagaki, Shinichi Kugimiya and Katsuya Kato

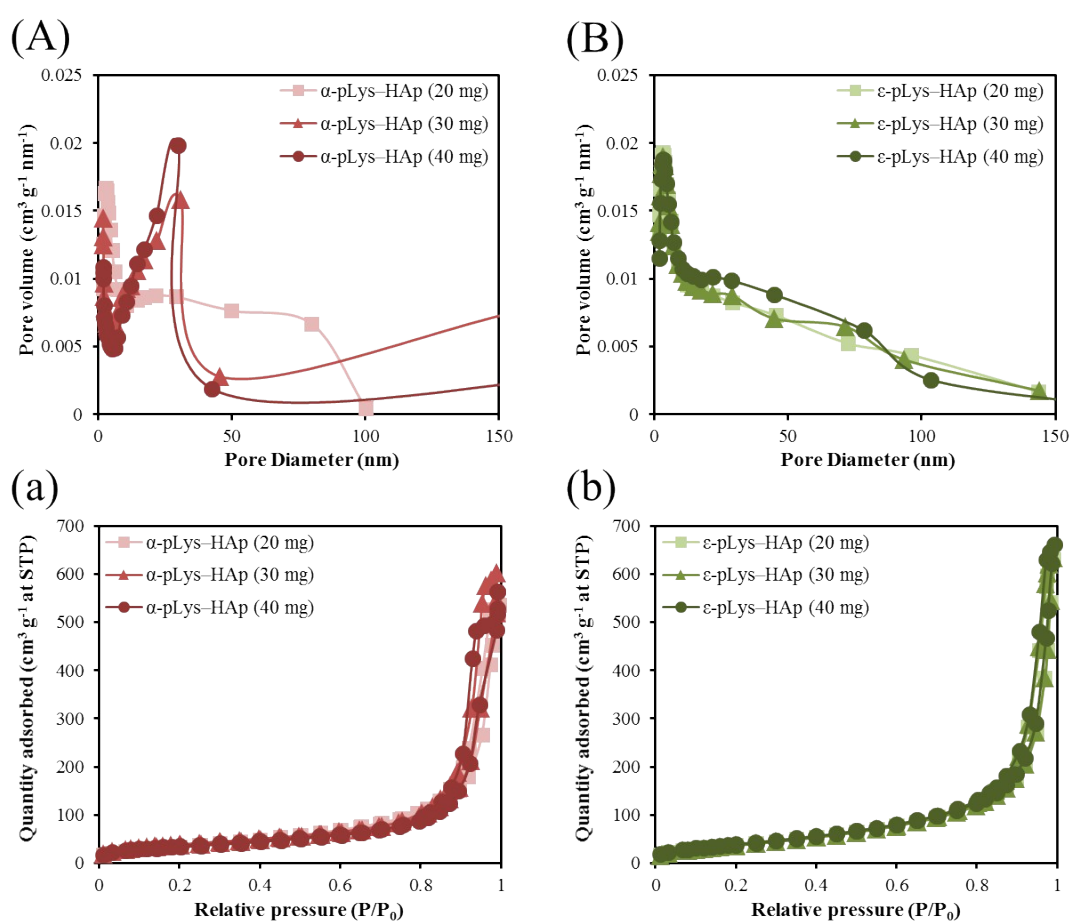

**Fig. S1** Pore size distribution curves (A and B) and nitrogen adsorption-desorption isotherms (a and b) of  $\alpha$ -pLys-HAp (20, 30 and 40 mg) and  $\epsilon$ -pLys-HAp (20, 30 and 40 mg).

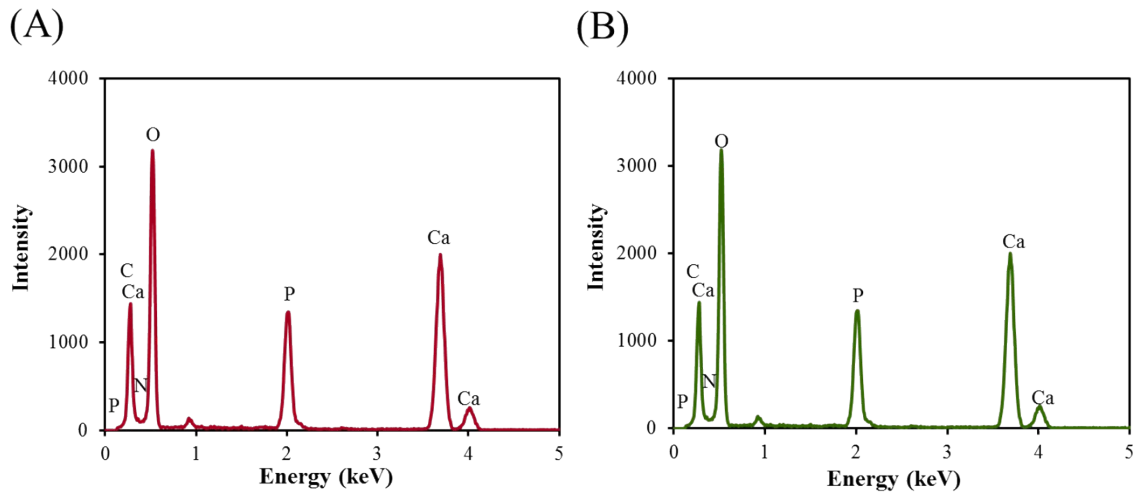

**Fig. S2** EDX spectra of (A)  $\alpha$ -pLys-HAp (40 mg) and (B)  $\epsilon$ -pLys-HAp (40 mg) (from Fig. 3).

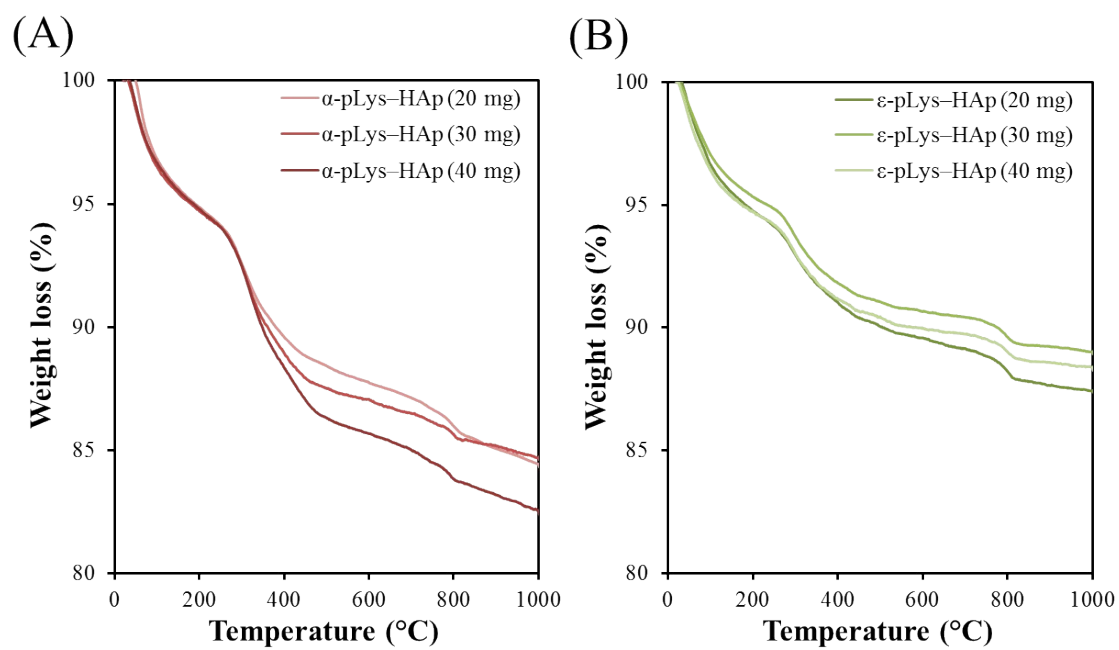

**Fig. S3** Thermogravimetry (TG) curves for (A)  $\alpha$ -pLys-HAp and (B)  $\epsilon$ -pLys-HAp.

**Table S1** Secondary structures (%) of  $\alpha$ -pLys and  $\epsilon$ -pLys

| <b>Sample</b>                                                  | <b><math>\alpha</math>-helix</b> | <b><math>\beta</math>-sheet</b> | <b><math>\beta</math>-turn</b> | <b>Other</b> |
|----------------------------------------------------------------|----------------------------------|---------------------------------|--------------------------------|--------------|
| <b><math>\alpha</math>-pLys</b>                                | —*                               | >99 %                           | —*                             | —*           |
| <b><math>\alpha</math>-pLys + PO<sub>4</sub><sup>a</sup></b>   | —*                               | 63 %                            | 18%                            | 19 %         |
| <b><math>\epsilon</math>-pLys</b>                              | —*                               | 89 %                            | 3 %                            | 8 %          |
| <b><math>\epsilon</math>-pLys + PO<sub>4</sub><sup>a</sup></b> | 21 %                             | 22 %                            | 28 %                           | 29 %         |

\* Trace percent.

<sup>a</sup> Each peptide ( $\alpha$ -Lys or  $\epsilon$ -Lys) (12 mg) was mixed with 20 mL (NH<sub>4</sub>)<sub>2</sub>HPO<sub>4</sub> solution (27 mM) and further stirred for 2 h at 20 °C. Then, the resulting product was obtained by freeze-drying.

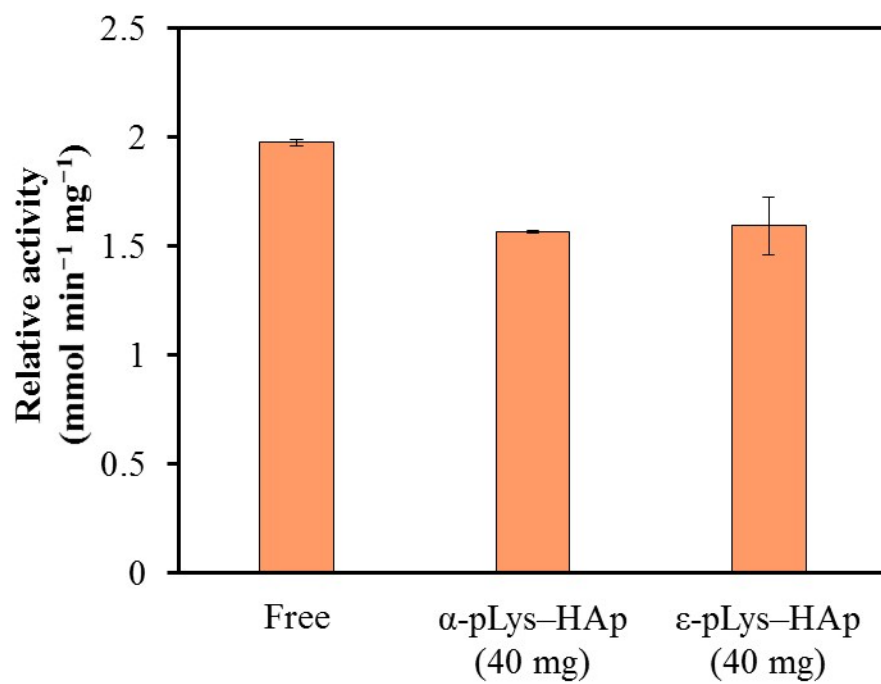

**Fig. S4** The relative activities of GOX adsorbed on  $\alpha$ -pLys-HAp (40 mg) and  $\epsilon$ -pLys-HAp (40 mg).
